# Supplementary material for: Paper-based electrochemical sensor for direct detection of caffeine in commercial beverage samples
Source: Royal Society of Chemistry journal article supplement (doi:10.1039/d6ra01066k), 2026-05-11
Supplement: d6ra01066k1.pdf [file d6ra01066k1.pdf]

## Electronic Supplementary Information (ESI)

### **Paper-based Electrochemical Sensor for Direct Detection of Caffeine in Commercial Beverage Samples**

Muhammad Yudha Syahputra<sup>a</sup>, Erika Shinchi<sup>b</sup>, Kenji Shida<sup>c</sup>, Masato Tominaga<sup>a\*</sup>

<sup>a</sup>*Graduate School of Science and Engineering, Saga University, 1 Honjomachi, Saga 840-8502, Japan*

<sup>b</sup>*Analytical Research Center for Experimental Science, Saga University, 1 Honjomachi, Saga 840-8502, Japan*

<sup>c</sup>*Faculty of Engineering, Kumamoto University, Kumamoto 860-8555, Japan*

*\*Corresponding author, Email: masato@cc.saga-u.ac.jp*

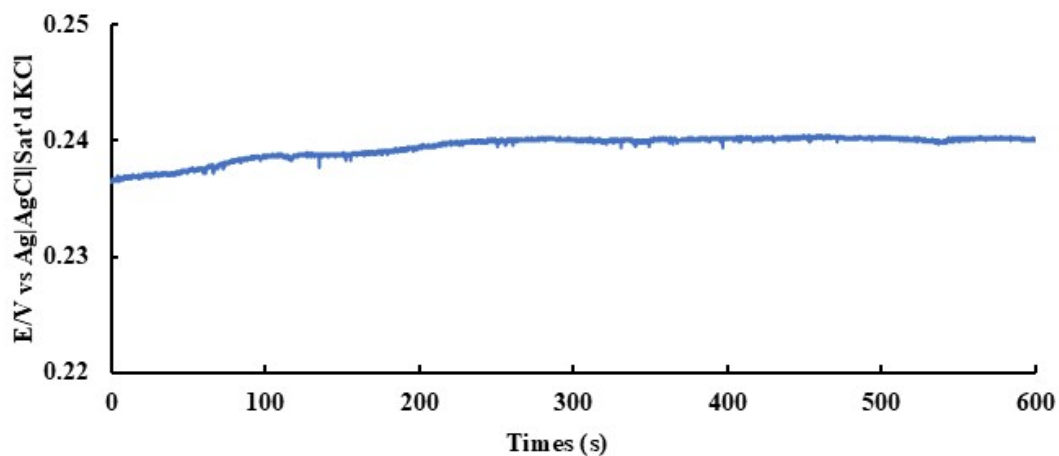

Fig. S1. Stability test of the Ag paste reference electrode in 0.1 M phosphate solution.

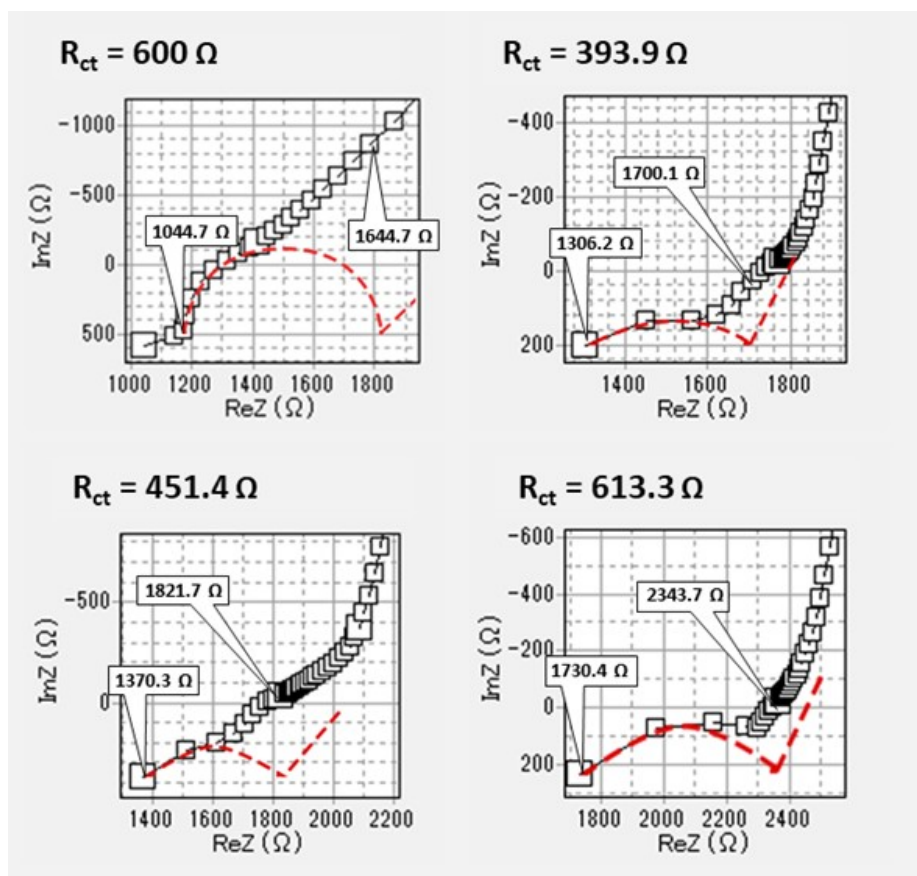

Fig. S2. Nyquist plot for the calculation of charge transfer resistance ( $R_{ct}$ ) of four different paper-based sensors.

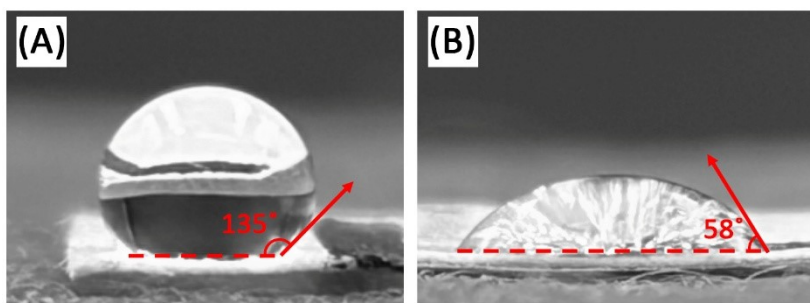

*Fig. S3. Contact angle measurement obtained from water drop test image of wax-modified paper (A) showing hydrophobic surface ( $90^\circ < \text{contact angle} < 150^\circ$ ) and CNF film on wax-modified paper (B) showing reduced contact angle ( $58^\circ$ ). The decreased contact angle confirmed wettability.*

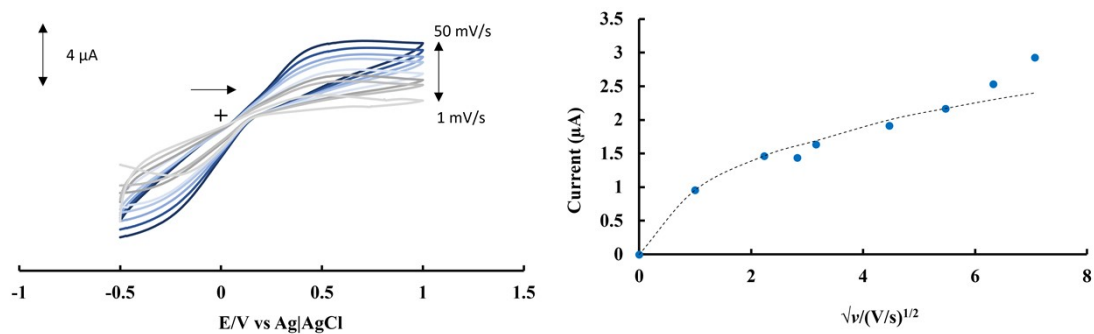

Fig. S4. CV result of 1 mM  $K_3[Fe(CN)_6]$  in 0.1 M sodium phosphate solution ( $pH = 7$ ) at paper-based sensor.

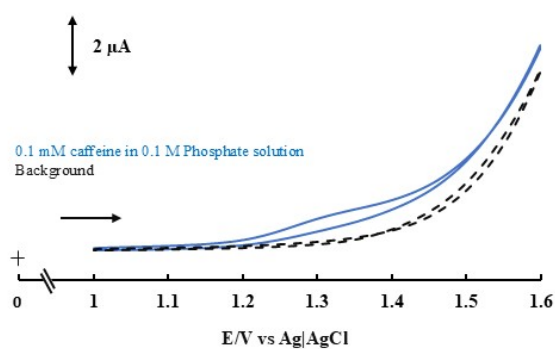

Fig. S5. CV result of 1 mM caffeine in 0.1 M phosphate solution at paper-based sensor.

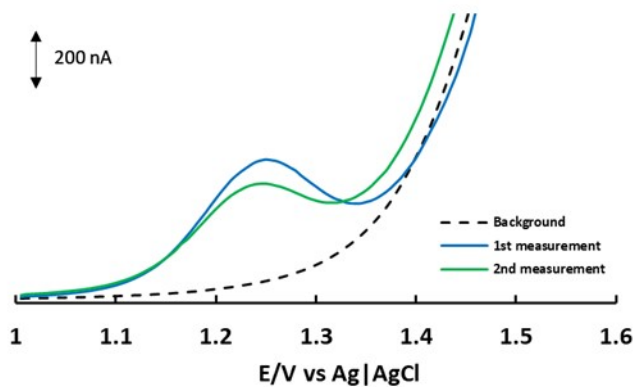

Fig. S6. SWV response of background (broken line) and caffeine detection for 1<sup>st</sup> measurement (solid blue line) and 2<sup>nd</sup> measurement (solid green line).

### CV plot in 10 mM Caffeine

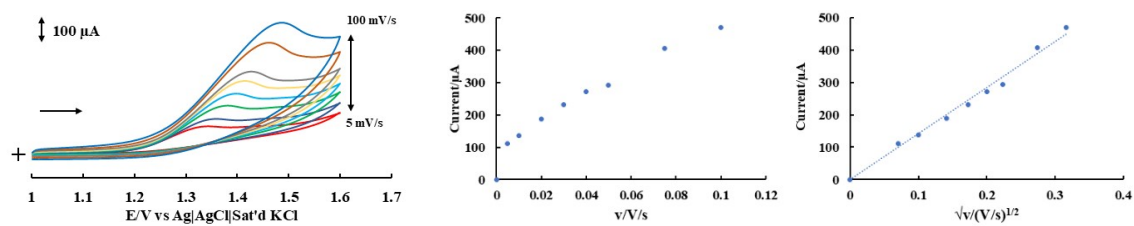

### CV plot in 100 μM Caffeine

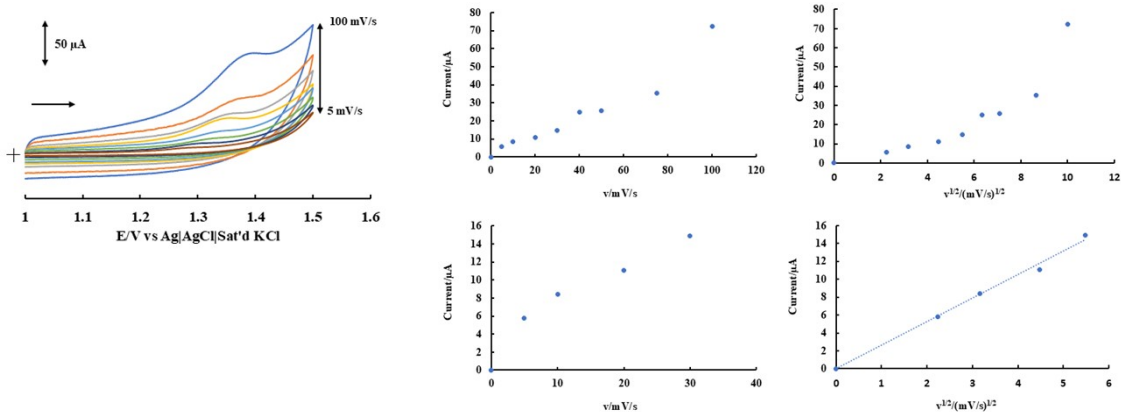

Fig. S7. Current vs square root scan rate ( $v^{1/2}$ ) plot of caffeine in 0.1 M phosphate solution (pH 1) at MWCNTs-modified GCE.

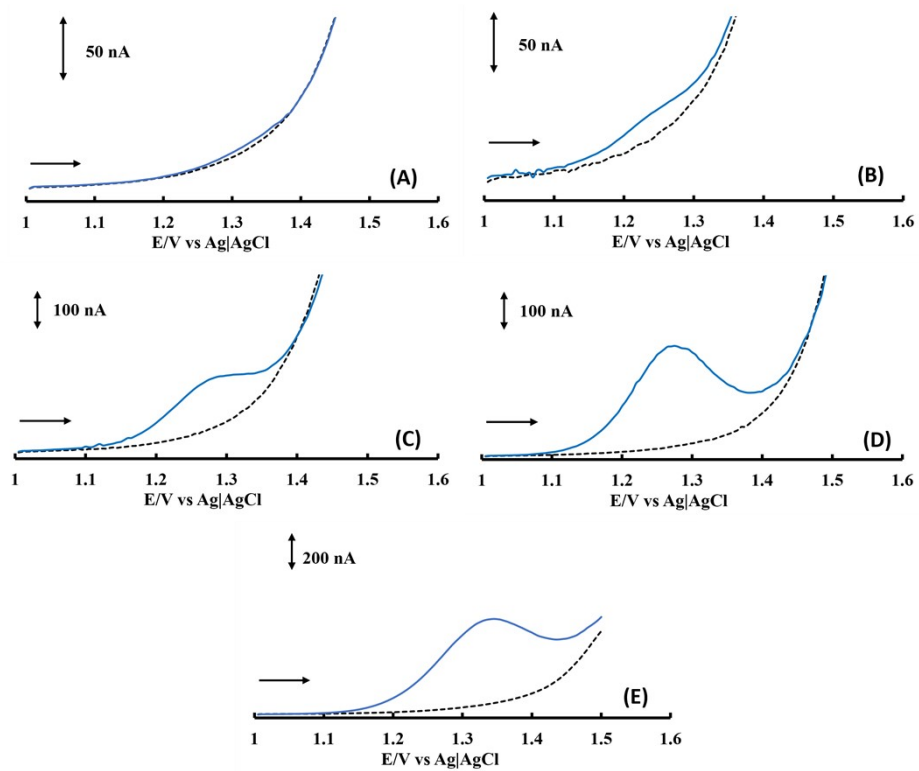

Fig. S8. SWV result of background (broken line) and 5  $\mu\text{M}$  (A), 10  $\mu\text{M}$  (B), 50  $\mu\text{M}$  (C), 100  $\mu\text{M}$  (D) and 200  $\mu\text{M}$  (E) of caffeine (solid line).

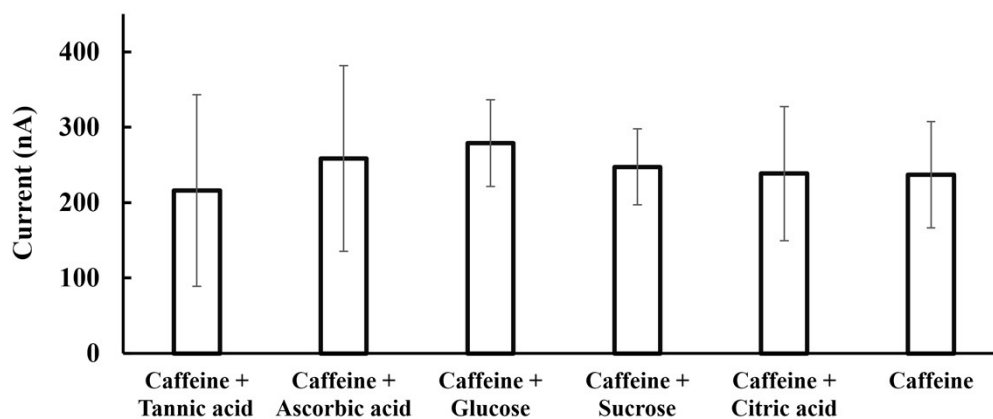

Fig. S9. Interference effect towards the oxidation of 0.1 mM caffeine in 0.1 M phosphate solution (interference: caffeine (10:1)). The reported error bars represented standard deviation from three independent measurements.

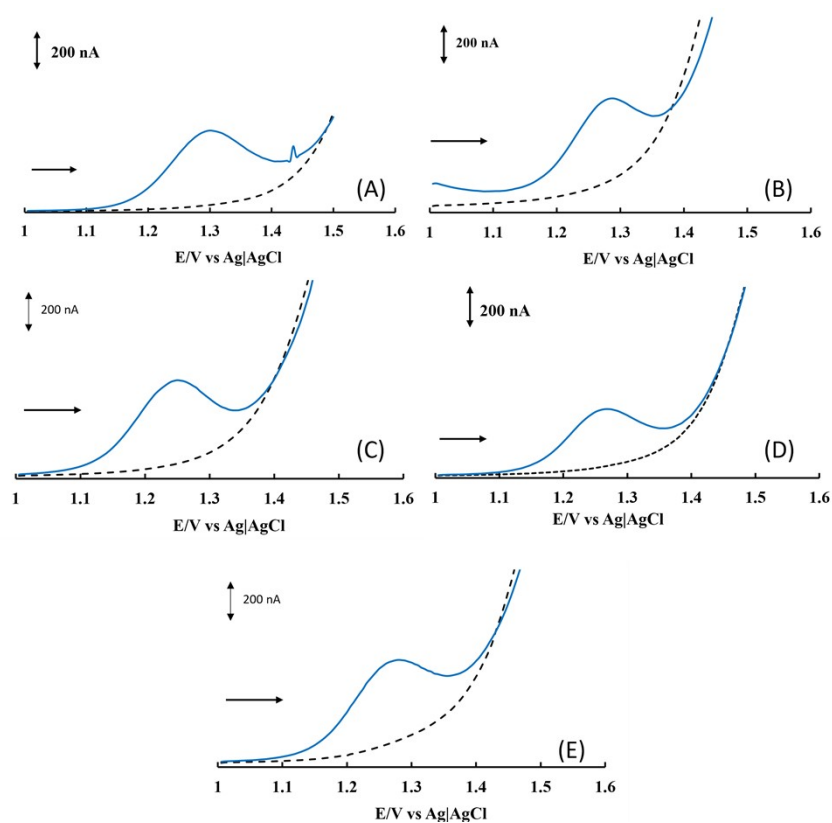

Fig. S10. SWV result of background (broken line) and interference molecule (solid line): tannic acid (A) ascorbic acid (B), glucose (C), sucrose (D) citric acid (E).

ANOVA result of interference study at 1:1 interferent to caffeine ratio

SUMMARY

| <i>Groups</i> | <i>Count</i> | <i>Sum</i> | <i>Average</i> | <i>Variance</i> |
|---------------|--------------|------------|----------------|-----------------|
| Sucrose       | 3            | 675        | 225            | 1294            |
| Glucose       | 3            | 721        | 241            | 1155            |
| Ascorbic acid | 3            | 716        | 239            | 409             |
| Citric acid   | 3            | 668        | 223            | 6485            |
| Tannic acid   | 3            | 753        | 251            | 1213            |
| Caffeine      | 3            | 711        | 237            | 4616            |

ANOVA

| <i>Source of Variation</i> | <i>SS</i> | <i>df</i> | <i>MS</i> | <i>F</i> | <i>P-value</i> | <i>F crit</i> |
|----------------------------|-----------|-----------|-----------|----------|----------------|---------------|
| Between Groups             | 1625      | 5         | 325       | 0.13     | 0.98           | 3.11          |
| Within Groups              | 30345     | 12        | 2529      |          |                |               |
| Total                      | 31970     | 17        |           |          |                |               |

ANOVA result of interference study at 10:1 interferent to caffeine ratio

SUMMARY

| <i>Groups</i> | <i>Count</i> | <i>Sum</i> | <i>Average</i> | <i>Variance</i> |
|---------------|--------------|------------|----------------|-----------------|
| Tannic acid   | 3            | 648        | 216            | 24242           |
| Ascorbic acid | 3            | 776        | 259            | 28089           |
| Glucose       | 3            | 837        | 279            | 1222            |
| Sucrose       | 3            | 742        | 247            | 3812            |
| Citric acid   | 3            | 716        | 239            | 11881           |
| Caffeine      | 3            | 711        | 237            | 4616            |

ANOVA

| <i>Source of Variation</i> | <i>SS</i> | <i>df</i> | <i>MS</i> | <i>F</i> | <i>P-value</i> | <i>F crit</i> |
|----------------------------|-----------|-----------|-----------|----------|----------------|---------------|
| Between Groups             | 6869      | 5         | 1374      | 0.11     | 0.99           | 3.11          |
| Within Groups              | 147723    | 12        | 12310     |          |                |               |
| Total                      | 154592    | 17        |           |          |                |               |

*Table S1. pH values of the solution before and after the addition of the Coca-Cola and Coffee, demonstrating negligible change in the electrolyte acidity*

|                                  |           |   |   |   |
|----------------------------------|-----------|---|---|---|
| pH of Electrolyte solution       |           | 1 | 1 | 1 |
| pH after addition of the samples | Coca-Cola | 1 | 1 | 1 |
|                                  | Coffee    | 1 | 1 | 1 |

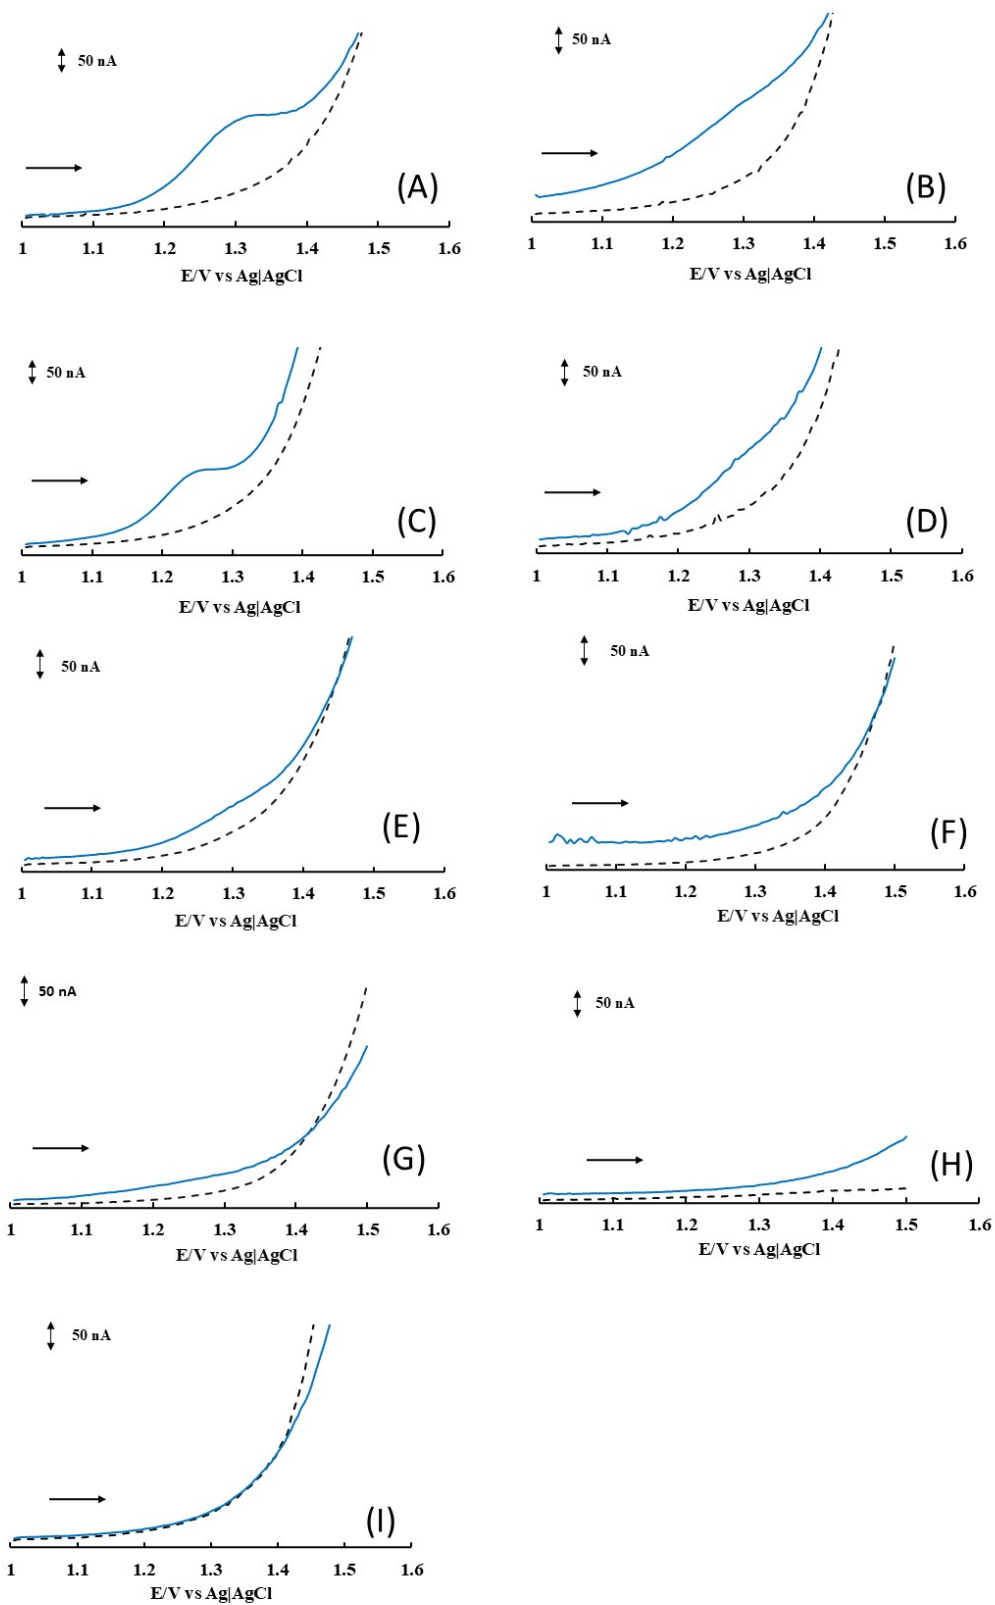

Fig. S11. SWV result of background (broken line) and caffeine drinks (solid line): monster energy (A), Black coffee – Georgia (B), coca – cola (C), oi ocha-green tea(D), CGC - oolong tea (E), oronamin C (F), UCC - decaffeinated coffee (G), kokoa – kikoma (H), Salted lychee (I).

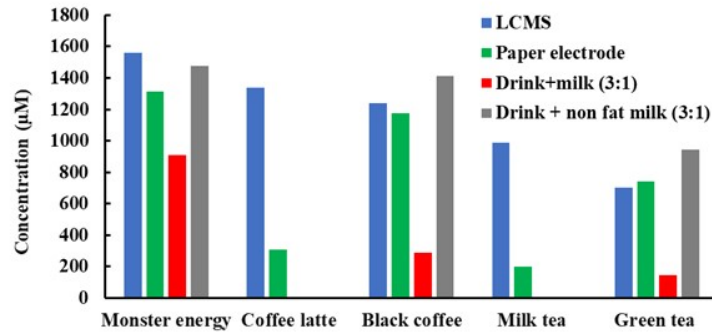

Fig. S12. Comparison of caffeine concentration measured with paper-based electrode and LC-MS in the presence of milk effect.

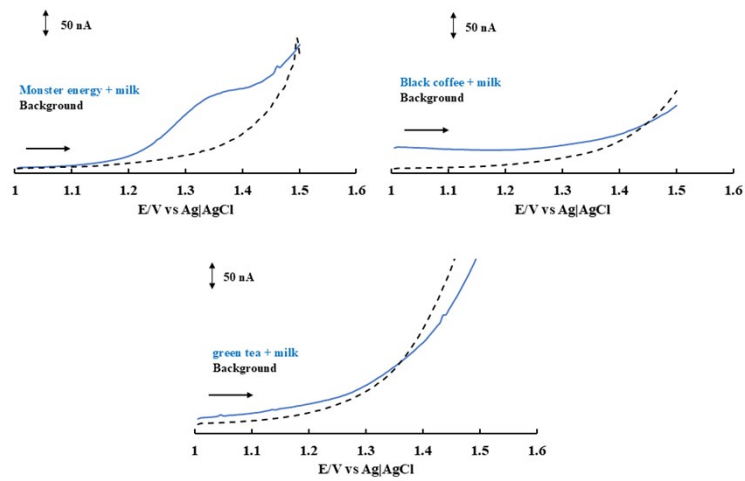

Fig. S13. SWV measurement result of background (broken line) and milk mixture drinks (solid line) for caffeine detection.

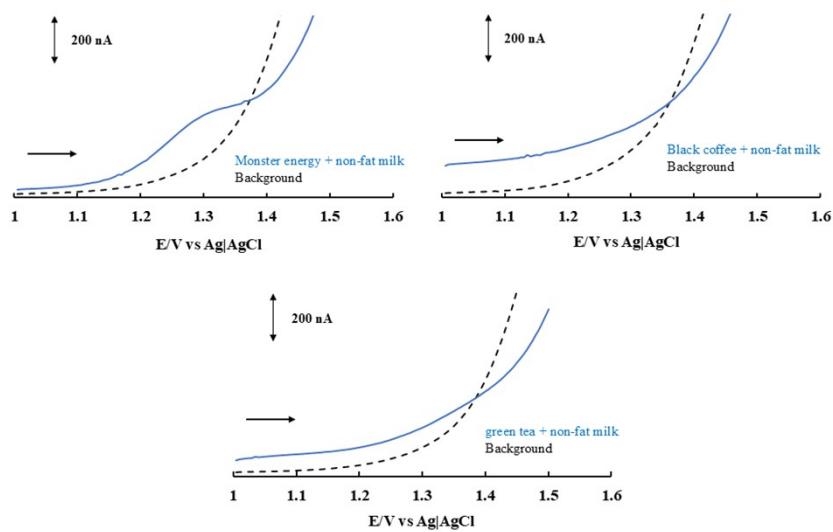

Fig. S14. SWV measurement result of background (broken line) and non-fat milk mixture drinks (solid line) for caffeine detection.

**Calculation of diffusion coefficient (D) by Randles-Shevcik equation.**

$$i_p = \pm (2.69 \times 10^5) n^{\frac{3}{2}} A D^{\frac{1}{2}} C v^{\frac{1}{2}}$$

Where,

$$\frac{i_p}{v^{\frac{1}{2}}} = \text{slope of current vs square root scan rate} = 1.41 \times 10^{-3} A V^{-1/2} s^{1/2}$$

$$n = \text{electron involved} = 4$$

$$A = \text{Surface area} = 28.3 \text{ mm}^2 = 0.0283 \text{ cm}^2$$

$$C = \text{Concentration} = 0.00001 \text{ mol cm}^{-3}$$

Therefore,

$$D = \text{diffusion coefficient} = 5.36 \times 10^{-6} \text{ cm}^2 \text{ s}^{-1}$$

**Calculation of diffusion coefficient (D) by Stoke-Einstein equation**

$$D = \frac{RT}{6\pi r \eta N}$$

Where,

$$R = \text{gas constant} = 8.314 \times 10^7 \text{ erg mol}^{-1} \text{ K}^{-1}$$

$$T = \text{Temperature} = 273 + 25 = 298 \text{ K}$$

r = radius

$$R_x = 0.78 \text{ nm}$$

$$R_y = 0.61 \text{ nm}$$

$$R_z = 0.21 \text{ nm}$$

$$N = \text{Avogadro number} = 6.02 \times 10^{23}$$

$$\eta = \text{viscosity of solvent } (\eta_{25} \text{ pure water}) = 0.00895 \text{ poise}$$

Therefore,

$$D_x = 3.1 \times 10^{-6} \text{ cm}^2 \text{ s}^{-1}$$

$$D_y = 4 \times 10^{-6} \text{ cm}^2 \text{ s}^{-1}$$

$$D_z = 1.2 \times 10^{-5} \text{ cm}^2 \text{ s}^{-1}$$
